# In the Absence of Effector Proteins, the *Pseudomonas aeruginosa* Type Three Secretion System Needle Tip Complex Contributes to Lung Injury and Systemic Inflammatory Responses

Jonathon P. Audia<sup>1,4\*</sup>, Ashley S. Lindsey<sup>3,4</sup>, Nicole A. Housley<sup>1,4</sup>, Courtney R. Ochoa<sup>3,4</sup>, Chun Zhou<sup>4</sup>, Michie Toba<sup>3,4</sup>, Masahiko Oka<sup>3,4</sup>, Naga S. Annamdevula<sup>5</sup>, Meshann S. Fitzgerald<sup>2,3,4</sup>, Dara W. Frank<sup>6</sup>, Diego F. Alvarez<sup>2,3,4\*</sup>

**1** Department of Microbiology and Immunology, University of South Alabama, Mobile, Alabama, United States of America, **2** Department of Internal Medicine, University of South Alabama, Mobile, Alabama, United States of America, **3** Department of Pharmacology, University of South Alabama, Mobile, Alabama, United States of America, **4** Center for Lung Biology, University of South Alabama, Mobile, Alabama, United States of America, **5** Department of Chemical and Biomolecular Engineering, University of South Alabama, Mobile, Alabama, United States of America, **6** Department of Microbiology and Molecular Genetics, Medical College of Wisconsin, Milwaukee, Wisconsin, United States of America

## Abstract

Herein we describe a pathogenic role for the *Pseudomonas aeruginosa* type three secretion system (T3SS) needle tip complex protein, PcrV, in causing lung endothelial injury. We first established a model in which *P. aeruginosa* wild type strain PA103 caused pneumonia-induced sepsis and distal organ dysfunction. Interestingly, a PA103 derivative strain lacking its two known secreted effectors, ExoU and ExoT [denoted PA103 ( $\Delta U/\Delta T$ )], also caused sepsis and modest distal organ injury whereas an isogenic PA103 strain lacking the T3SS needle tip complex assembly protein [denoted PA103 ( $\Delta PcrV$ )] did not. PA103 ( $\Delta U/\Delta T$ ) infection caused neutrophil influx into the lung parenchyma, lung endothelial injury, and distal organ injury (reminiscent of sepsis). In contrast, PA103 ( $\Delta PcrV$ ) infection caused nominal neutrophil infiltration and lung endothelial injury, but no distal organ injury. We further examined pathogenic mechanisms of the T3SS needle tip complex using cultured rat pulmonary microvascular endothelial cells (PMVECs) and revealed a two-phase, temporal nature of infection. At 5-hours post-inoculation (early phase infection), PA103 ( $\Delta U/\Delta T$ ) elicited PMVEC barrier disruption via perturbation of the actin cytoskeleton and did so in a cell death-independent manner. Conversely, PA103 ( $\Delta PcrV$ ) infection did not elicit early phase PMVEC barrier disruption. At 24-hours post-inoculation (late phase infection), PA103 ( $\Delta U/\Delta T$ ) induced PMVEC damage and death that displayed an apoptotic component. Although PA103 ( $\Delta PcrV$ ) infection induced late phase PMVEC damage and death, it did so to an attenuated extent. The PA103 ( $\Delta U/\Delta T$ ) and PA103 ( $\Delta PcrV$ ) mutants grew at similar rates and were able to adhere equally to PMVECs post-inoculation indicating that the observed differences in damage and barrier disruption are likely attributable to T3SS needle tip complex-mediated pathogenic differences post host cell attachment. Together, these infection data suggest that the T3SS needle tip complex and/or another undefined secreted effector(s) are important determinants of *P. aeruginosa* pneumonia-induced lung endothelial barrier disruption.

**Citation:** Audia JP, Lindsey AS, Housley NA, Ochoa CR, Zhou C, et al. (2013) In the Absence of Effector Proteins, the *Pseudomonas aeruginosa* Type Three Secretion System Needle Tip Complex Contributes to Lung Injury and Systemic Inflammatory Responses. PLoS ONE 8(11): e81792. doi:10.1371/journal.pone.0081792

**Editor:** Suzanne Fleiszig, UC Berkeley, United States of America

**Received:** June 18, 2013; **Accepted:** October 16, 2013; **Published:** November 27, 2013

**Copyright:** © 2013 Audia et al. This is an open-access article distributed under the terms of the Creative Commons Attribution License, which permits unrestricted use, distribution, and reproduction in any medium, provided the original author and source are credited.

**Funding:** This work was supported in part by grant # HL066299 from National Institutes of Health/National Heart, Lung, and Blood Institute, by grant # 0835134N from American Heart Association, by grant # AI085002 from National Institutes of Health/National Institute of Allergy and Infectious Diseases, and by equipment grant # 10RR027535 from the National Institutes of Health. The funders had no role in study design, data collection and analysis, decision to publish, or preparation of the manuscript. The funders had no role in study design, data collection and analysis, decision to publish, or preparation of the manuscript.

**Competing interests:** The authors have declared that no competing interests exist.

\* E-mail: jaudia@southalabama.edu (JPA); dalvarez@southalabama.edu (DFA)

## Introduction

*Pseudomonas aeruginosa* is a Gram-negative, opportunistic pathogen that causes nosocomial infections in patients

undergoing mechanical ventilation and in people that are immunocompromised (e.g., severe burn) [1–6]. This pathogen is also a major cause of chronic infections in cystic fibrosis patients leading to increased mortality [7–10]. *P. aeruginosa* is

a ubiquitous environmental microbe and is typically considered an extracellular pathogen that attaches to eukaryotic cells and/or forms biofilms to establish host colonization [11–13]. Cellular invasive *P. aeruginosa* phenotypes have been described [14–16] but the role of intracellular pseudomonads in pathogenesis remains unclear. In susceptible hosts, acute and chronic *P. aeruginosa* infections are difficult to treat owing to endogenous antibiotic resistance systems such as multi-drug efflux pumps and biofilms.

*P. aeruginosa* is a leading cause of pneumonia-induced Acute Respiratory Distress Syndrome (ARDS) [1,3,4,8,9,17,18]. Upon infection of the airway, pseudomonads infect alveolar epithelial cells and resident macrophages, eliciting release of pro-inflammatory cytokines to recruit immune cells into the lung parenchyma and airspaces [17,19–22]. Subsequent damage to the alveolar epithelial barrier allows direct infection of lung endothelial cells that, along with the deleterious effects of endotoxin and cytokines, precipitate vascular endothelial barrier disruption [2,20,23–27].

Pulmonary microvascular endothelial cells (PMVECs) form contiguous, semi-permeable barriers between the bloodstream and the interstitial space, limiting the vectorial movement of fluid, solute, macromolecules, and gases [28–35]. Thus, disruption of PMVEC barriers by *P. aeruginosa* infection results in the hallmark features of ARDS, namely, increased neutrophil infiltration, increased fluid filtration, pulmonary edema, and low blood oxygen levels [36–38].

The propensity for *P. aeruginosa* infection to elicit ARDS and the attendant PMVEC injury is largely dependent on the cadre of virulence factors available to the pathogen. In particular, highly virulent clinical *P. aeruginosa* isolates cause cellular damage through the use of a type three secretion system (T3SS) that injects effector proteins directly into the cytoplasm of an infected eukaryotic cell [4,10,39–42]. To date, four *P. aeruginosa* T3SS-delivered effector proteins (ExoU, ExoS, ExoT, and ExoY) have been described [40,43]. All of these T3SS-delivered effector proteins are notoriously dependent upon eukaryotic co-factors to activate their enzymatic activities. ExoU is a potent phospholipase A<sub>2</sub> cytotoxin that rapidly causes eukaryotic cell lysis and stimulates lipid signal transduction cascades [44,45]. ExoU activation is mediated by interactions with eukaryotic mono- and poly-ubiquitin, and ubiquitinated proteins such as Cu/Zn superoxide dismutase 1 [46–49]. ExoS and ExoT are dual functioning Rho GTPase activating and ADP-ribosyltransferase effectors that disrupt eukaryotic cell signaling, prevent phagocytosis, and mediate the pathogen's ability to disrupt the epithelial barrier [43,45,50,51]. ExoS and ExoT are activated by the 14-3-3 family of proteins. ExoY is an adenyl cyclase that increases levels of cAMP in the cytoplasm disrupting PMVEC barrier function [41,43]. A eukaryotic co-factor for ExoY has yet to be identified. Interestingly, all four effector proteins are rarely found together in a given clinical isolate with ExoU and ExoS being almost mutually exclusive. Of the four effector proteins, ExoU and ExoS are known to elicit cellular cytotoxicity, and strains that secrete ExoU are associated with poor patient outcome [4,39,52]. It is thought that the predominant role of the effector proteins in pathogenesis is to mediate cellular damage,

impair phagocyte engulfment, and suppress immune cell infiltration, which ultimately facilitate bacterial persistence in the lung and subsequent dissemination [4,21,44,45,51–53].

The T3SS is analogized as a highly complex and ordered molecular syringe that directly facilitates energy-dependent intoxication of eukaryotic host cell cytoplasm with the effector proteins [54–56]. In the bacterial cytoplasm, the activity of molecular chaperones and ATPases mobilize the effector proteins for secretion [54]. At the eukaryotic cell surface the *P. aeruginosa* PopB, PopD, and PcrV proteins constitute the T3SS needle tip complex; forming a membrane pore through which the effector proteins translocate into host cells [7,57,58]. The pore-forming potential of the PopBD/PcrV complex has been demonstrated using red blood cell hemolysis assays [58–61]. Regulation of membrane pore formation by the T3SS needle tip complex is dependent upon PcrV. Indeed, *pcrV* null mutant strains of *P. aeruginosa* are unable to directly inject effector proteins into eukaryotic host cells but instead, display dysregulated secretion of effector proteins into the culture medium [62,63]. As a result, *pcrV* mutants are avirulent and the PcrV protein is being developed and tested as a protective antigen against *P. aeruginosa*-induced pneumonia.

Beyond its known requirement for regulated effector protein delivery, the T3SS needle tip complex itself is emerging as a virulence factor that mediates critical pathogen-host interactions [36,62]. In *P. aeruginosa* strains that do not encode any of the four known effector proteins ( $\Delta$ exoU/S/T/Y), the T3SS needle tip complex alone has been shown to mediate virulence-associated effects such as pro-inflammatory cytokine induction, immune cell infiltration into the lung, immune cell death, and mortality in animal models of infection [36]. Indeed, clinical isolates that express only a functional T3SS with no effector proteins have been isolated from patients and correlated with increased morbidity and mortality compared to strains lacking a functional T3SS [4]. However, no studies to date have directly assessed a role for the *P. aeruginosa* T3SS needle tip complex in non-immune cell mediated pathogenesis of lung injury and PMVEC barrier dysfunction during pneumonia-induced ARDS. To this end, we have developed rat airway- and isolated PMVEC-infection model systems and described a role for the *P. aeruginosa* T3SS needle tip complex protein, PcrV, as a virulence factor that mediates PMVEC barrier disruption, lung injury, sepsis, and systemic dysfunction.

## Results

### *P. aeruginosa* strain PA103 Causes Sepsis and Multi-Organ Dysfunction in a Rat Airway Infection Model

*P. aeruginosa* strain PA103 is a virulent clinical isolate that encodes only two T3SS effector proteins, namely ExoU and ExoT. We used strain PA103 to establish an airway infection model where lung injury is induced by intratracheal instillation of bacteria into adult, male CD rats. Figure 1A shows the one-week mortality dose-response curve from rats inoculated with PA103 (wild type) where  $\sim 7 \times 10^7$  colony forming units (CFUs) resulted in a 50% mortality rate. In patients, airway infection with *P. aeruginosa* often progresses to sepsis and, in some instances, multiple organ dysfunction. Table 1 shows animal

Figure 1

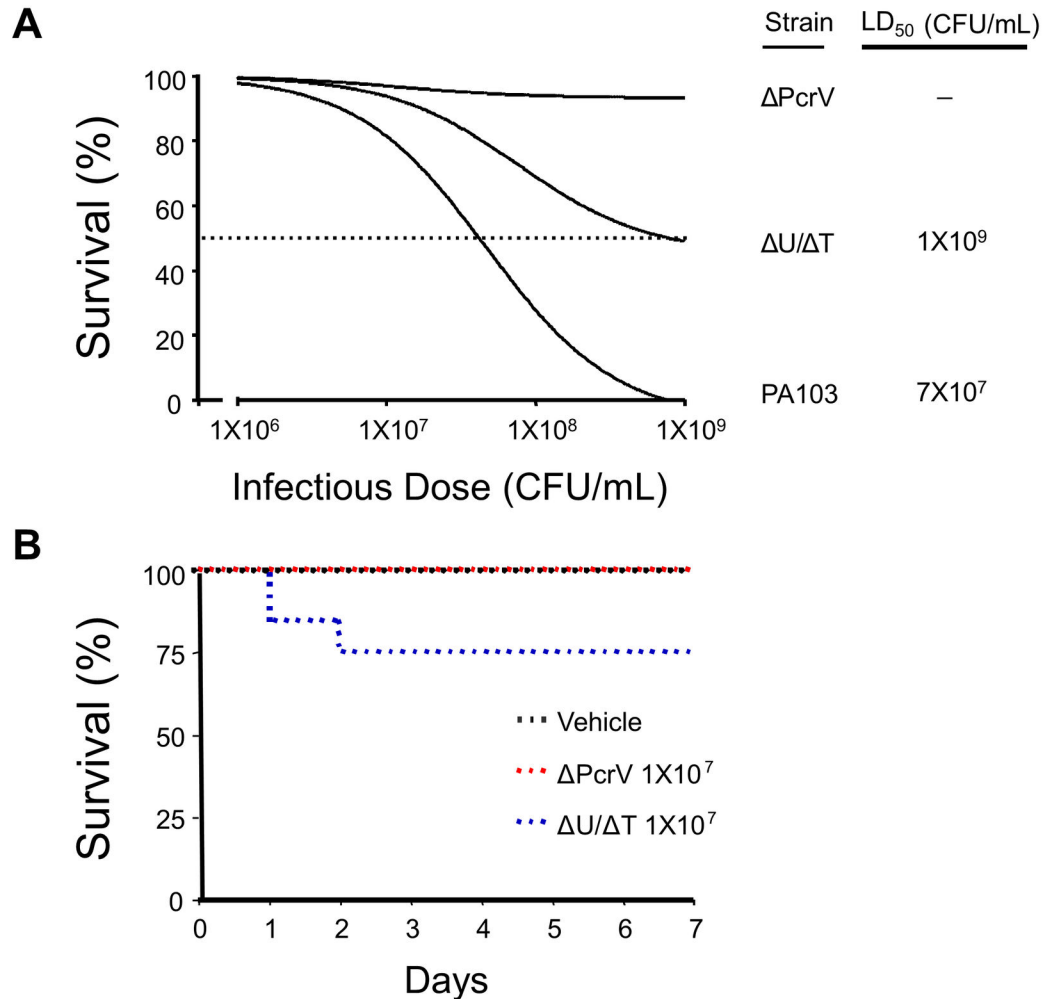

**Figure 1. *P. aeruginosa* T3SS needle tip complex protein PcrV associates with mortality in a rat model of lung infection. A.** Intratracheal instillation of the *P. aeruginosa* wild type PA103 and mutant PA103 ( $\Delta U/\Delta T$ ) strains into rats resulted in dose-dependent mortality compared to the mutant PA103 ( $\Delta PcrV$ ) which caused no mortality at 1-week post-infection. Doses (CFUs/mL) are listed in the figure. Data represent at least  $n=20$  per group. **B.** One week survival analysis (Kaplan Meier curve) at a sub-LD<sub>50</sub> dose ( $\sim 1 \times 10^7$  CFUs). Mortality in the PA103 ( $\Delta U/\Delta T$ ) cohort was observed within 48-hours post-infection. Black dotted line represents vehicle control (saline solution), red dotted line represents infection with PA103 ( $\Delta PcrV$ ), and blue dotted line represents infection with PA103 ( $\Delta U/\Delta T$ ). Data represent at least  $n=20$  per group.

doi: 10.1371/journal.pone.0081792.g001

biometrics at 48-hours post-inoculation with a moderate dose of PA103 ( $\sim 2.5 \times 10^7$  CFUs). Infection elicited elevated body temperature and adversely affected liver function as indicated by elevated levels of AST (Table 1), and liver pathological analysis revealed the presence of periportal inflammation (Figure S1). PA103 infection also resulted in depressed cardiac function as indicated by decreased dP/dt and stroke work (Table 1), and bacteria were detected in the blood and lungs by direct plating on *Pseudomonas* isolation agar (data not shown). PA103 infection increased creatinine levels when compared to vehicle control (Table 1), and kidney pathological analysis revealed the presence of tubular casts indicative of sepsis-induced injury (Figure S2). In addition, PA103 infection caused

a systemic neutrophilia, accompanied by a marked lymphopenia (Table 1). Together these data suggest that our rat airway instillation model using PA103 recapitulates infection-induced morbidity, sepsis, multi-organ dysfunction, and mortality.

#### The *P. aeruginosa* PcrV Protein Contributes to Mortality and Morbidity in a Rat Airway Infection Model

To examine the role of the T3SS needle tip complex (specifically, PcrV) in *P. aeruginosa* virulence, we compared rats infected with an isogenic PA103 mutant encoding an intact T3SS needle tip complex but defective in the synthesis of ExoU and ExoT genes [PA103 ( $\Delta U/\Delta T$ )] to rats infected with an

**Table 1.** Biometrics of Vehicle Control and *P. aeruginosa*-Infected Animals <sup>a</sup>.

|                              | Vehicle      | PA103                   | ΔPcrV                | ΔU/ΔT                   | P value             |
|------------------------------|--------------|-------------------------|----------------------|-------------------------|---------------------|
| Temperature (rectal, °C)     | 37.1 ± 0.1   | 38.8 ± 0.3 <sup>c</sup> | 37.3 ± 0.2           | 38.2 ± 0.3 <sup>c</sup> | 0.0069 <sup>b</sup> |
| Total leukocytes (counts/μL) | 5293 ± 592   | 6497 ± 516              | 6530 ± 35            | 4433 ± 371              | 0.0540 <sup>b</sup> |
| Neutrophil differential (%)  | 11 ± 1       | 86 ± 2 <sup>d</sup>     | 33 ± 11 <sup>d</sup> | 65 ± 4 <sup>d</sup>     | 0.0001 <sup>b</sup> |
| Lymphocyte differential (%)  | 88 ± 1       | 14 ± 2 <sup>d</sup>     | 66 ± 10 <sup>d</sup> | 34 ± 6 <sup>d</sup>     | 0.0001 <sup>b</sup> |
| AST (U/L)                    | 71 ± 2       | 127 ± 21 <sup>e</sup>   | 89 ± 6               | 109 ± 6 <sup>e</sup>    | 0.0069 <sup>b</sup> |
| Creatinine (mg/dL)           | 0.5 ± 0.0    | 0.7 ± 0.1 <sup>f</sup>  | 0.6 ± 0.1            | 0.7 ± 0.1 <sup>f</sup>  | 0.0720 <sup>b</sup> |
| dP/dt (mmHg/sec)             | 13438 ± 2235 | 6687 ± 399 <sup>g</sup> | N.D.                 | N.D.                    | 0.0410 <sup>g</sup> |
| Stroke work (mmHg x mL)      | 28 ± 3       | 13 ± 1 <sup>g</sup>     | N.D.                 | N.D.                    | 0.0066 <sup>g</sup> |

<sup>a</sup>. Anesthetized adult male CD rats were intratracheally instilled with saline solution (vehicle) or individually with the three different *P. aeruginosa* strains at  $\sim 2.5 \times 10^7$  CFU/mL. At 48-h post-infection, animals were anesthetized and body temperature measured rectally. Blood chemistry analysis was used to assess liver function (aspartate aminotransferase, AST) and kidney function (creatinine). Left ventricular function was assessed by two contractility indexes, namely dP/dt and stroke work.

<sup>b</sup>. Comparisons among groups were made using a one-way ANOVA and  $P < 0.05$  was considered statistically significant. Significant differences among groups were established by Newman-Keuls *post-hoc* analysis.

<sup>c</sup>. Significantly different compared to vehicle and ΔPcrV.

<sup>d</sup>. Significantly different among all groups.

<sup>e</sup>. Significantly different compared to vehicle.

<sup>f</sup>. Not significantly different by one-way ANOVA but significantly different when individually compared to vehicle using an unpaired *t*-test ( $P < 0.05$ ).

<sup>g</sup>. Significantly different compared to vehicle using an unpaired *t*-test ( $P < 0.05$ ).

N.D., not determined.

doi: 10.1371/journal.pone.0081792.t001

isogenic PA103 mutant deleted for the *pcrV* gene [PA103 (ΔPcrV)]. Figure 1A shows that inoculation with  $\sim 1 \times 10^9$  CFUs of the PA103 (ΔU/ΔT) mutant resulted in a 50% mortality rate at one week post-inoculation whereas the PA103 (ΔPcrV) mutant did not cause mortality at the maximal dose tested. Thus, although the PA103 (ΔU/ΔT) mutant is attenuated compared to wild type PA103, it causes infection-induced mortality in a PcrV-dependent manner.

While it is clear that morbidity in *P. aeruginosa*-infected patients strongly correlates with secretion of effector proteins [4], it is poorly understood whether *P. aeruginosa* expressing only a functional T3SS needle tip complex elicits lung endothelial injury via immune cell-independent mechanisms [36]. Figure 1B shows a Kaplan-Meier curve at an inoculation dose of  $\sim 1 \times 10^7$  CFUs, where  $\sim 75\%$  and 100% of the animals survive at 48-hours post-inoculation with PA103 (ΔU/ΔT) or PA103 (ΔPcrV), respectively. Once established for the two mutant *P. aeruginosa* strains, this moderate infectious dose was used in all subsequent *in vivo* experiments to assess indexes of injury at 48-hours post-inoculation. PA103 (ΔU/ΔT) elicited elevated body temperature and adversely affected liver function as

indicated by elevated AST (Table 1), and the presence of periportal inflammation, whereas PA103 (ΔPcrV) did not (Figure S1). Only PA103 (ΔU/ΔT) could be detected in the blood by direct plating (data not shown). While neither *P. aeruginosa* mutant strain affected kidney function as measured by creatinine levels (Table 1), infection with PA103 (ΔU/ΔT) caused modest formation of tubular casts, whereas PA103 (ΔPcrV) did not (Figure S2). Finally, infection with PA103 (ΔU/ΔT) also caused a systemic leukopenia with neutrophilia, accompanied by a marked lymphopenia (Table 1). Together these data suggest that PcrV and the T3SS needle tip complex contribute to infection-induced morbidity including sepsis- and multi-organ dysfunction.

### The *P. aeruginosa* PcrV Protein Contributes to Lung Injury and Vascular Endothelial Barrier Disruption in a Rat Airway Infection Model

Macroscopic observation of lungs at 48-hours post-inoculation paralleled the mortality and morbidity observations described above, in that PA103 (ΔU/ΔT) caused more overt damage to the lung than PA103 (ΔPcrV) (Figure S3). We next compared fixed sections of the injured portions of lungs from rats inoculated with either PA103 (ΔU/ΔT) or PA103 (ΔPcrV) by hematoxylin and eosin (H&E) staining in survivors at 48-hours post-inoculation (both mutant strains were recovered from lung tissue at equivalent levels, data not shown). Figure 2A shows H&E-stained sections imaged by light microscopy. The left panel set shows normal lung sections from an animal that underwent intra-tracheal instillation with saline solution (vehicle control). The septal network is thin and the airspaces are pristine. The center panel set shows lung sections from an animal infected with PA103 (ΔPcrV) which resulted in septal thickening and edema. The right panel set shows that infection with PA103 (ΔU/ΔT) resulted in thickening of the septal network and lung parenchyma, and the airspaces are either collapsed and/or appear edematous (stained proteinaceous fluid, marked with arrowheads in the 20X panel). Interestingly, infection with PA103 (ΔU/ΔT) resulted in formation of perivascular fluid-filled cuffs (marked with arrowheads in the 10X panel) which were not observed in PA103 (ΔPcrV)-infected animals or vehicle controls.

An independent set of lung sections were stained for myeloperoxidase to facilitate enumeration of infiltrating neutrophils as an indicator of inflammation. Figure 2B shows that infection with PA103 (ΔU/ΔT) induced significant neutrophil infiltration compared to PA103 (ΔPcrV). This result supports observations made using a murine model of infection [36]. Together, these data suggest that the presence of a functional T3SS needle tip complex in PA103 (ΔU/ΔT) contributes to *P. aeruginosa*-induced lung injury.

Lung histopathology indicated that the presence of a functional T3SS needle tip complex was potentially influencing the extent of injury. Therefore, vascular permeability was quantitatively assessed by excising, *en bloc*, the heart and lungs from control and infected animals and measuring the fluid filtration coefficient ( $K_f$ ). In this method, the heart and lungs are suspended in a force transducer where buffer is perfused at a constant pressure over time and the rate of weight gain is used

**Figure 2 A**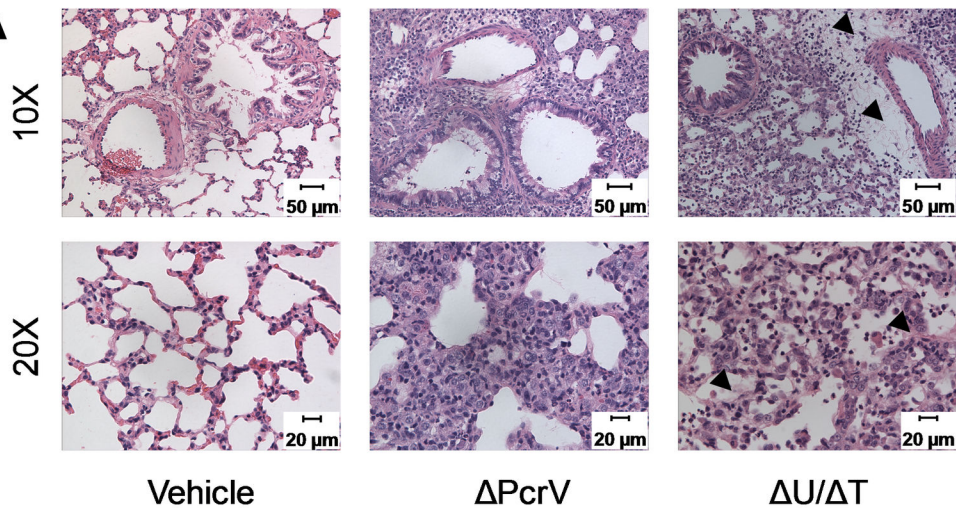**B**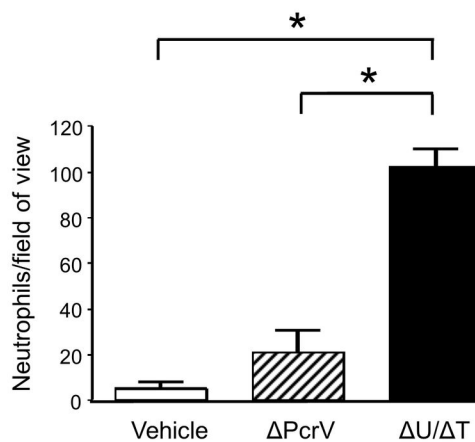**C**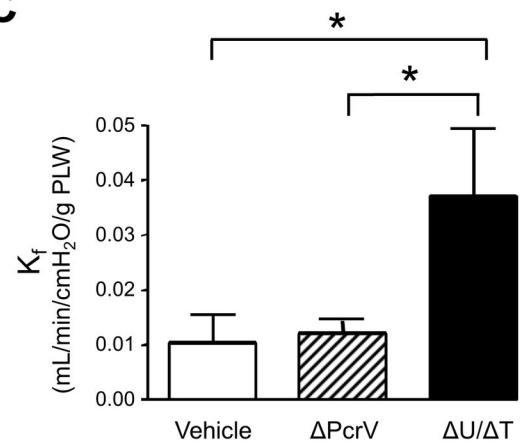

**Figure 2. *P. aeruginosa* T3SS needle tip complex protein PcrV associates with lung injury.** **A.** Injured areas of the lung were prepared for histological hematoxylin/eosin analysis at 48-hours post-inoculation. Animals were inoculated with saline solution (vehicle control), with  $\sim 1 \times 10^7$  CFUs of PA103 ( $\Delta U/\Delta T$ ), or with  $\sim 1 \times 10^7$  CFUs of PA103 ( $\Delta PcrV$ ). Lung sections imaged at 10X (top panels) and 20X (bottom panels) revealed that intratracheal instillation of PA103 ( $\Delta U/\Delta T$ ) or PA103 ( $\Delta PcrV$ ) caused lung injury. Inoculation with PA103 ( $\Delta U/\Delta T$ ) resulted in fluid accumulation around the bronchovascular bundles (vascular cuffs, arrow heads, upper panel) and lesions reminiscent of diffuse alveolar damage (arrow heads, lower panel), characterized by fluid accumulation and inflammatory cell infiltration within the air space. Inoculation with PA103 ( $\Delta PcrV$ ) caused collapsed air spaces, resembling atelectasis with recruitment of inflammatory cells. These histological patterns suggest that the two PA103 mutants are capable to cause lung damage/injury, although the lesions appear distinct from one another. **B.** Injured areas of the lung were prepared for histological myeloperoxidase (MPO) staining analysis to reveal the extent of neutrophil infiltration. Inoculation with PA103 ( $\Delta U/\Delta T$ ) caused significant neutrophil recruitment compared to either vehicle control or to inoculation with PA103 ( $\Delta PcrV$ ). The average numbers of MPO positive cells from at least 5 independent fields of view from three different animals per condition are presented. Error bars are the standard error of the mean. The asterisks indicate a statistically significant difference ( $P < 0.05$ ) by one-way ANOVA and Newman-Keuls *post-hoc* test. **C.** Lungs from vehicle control (saline solution) and *P. aeruginosa*-inoculated animals were isolated *en bloc* at 48-hours post-inoculation for analysis of hydraulic permeability ( $K_f$ ). Inoculation with PA103 ( $\Delta U/\Delta T$ ) caused significant permeability increases compared to either vehicle control or to inoculation with PA103 ( $\Delta PcrV$ ). The average  $K_f$  values from 5 different animals per group are shown. Error bars are the standard error of the mean. The asterisks indicate a statistically significant difference ( $P < 0.05$ ) by one-way ANOVA and Newman-Keuls *post-hoc* test.

doi: 10.1371/journal.pone.0081792.g002

## Figure 3

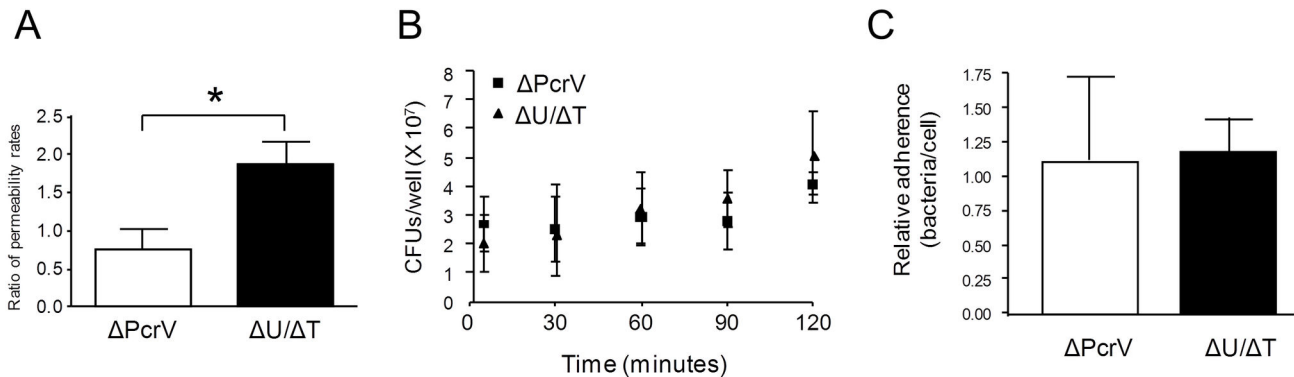

**Figure 3. *P. aeruginosa* T3SS needle tip complex protein PcrV associates with increased PMVEC permeability during early phase infection.** **A.** Isolated rat PMVECs were grown on transwells to confluence and permeability measured as a function of FITC-dextran flux across the monolayer. PMVECs were inoculated with medium alone, saline solution (vehicle control), or with either *P. aeruginosa* mutant at a 40:1 MOI. Flux assays were initiated at 4-hours post-inoculation by the addition of FITC-dextran and flux monitored for 1-hour. Average flux rate data at 5-hours post-inoculation from the SS vehicle control transwells were used to normalized the flux rate from PA103 ( $\Delta U/\Delta T$ ) or PA103 ( $\Delta PcrV$ ) ( $n=3$  for each condition). Inoculation with PA103 ( $\Delta U/\Delta T$ ) caused significant increases in PMVEC permeability compared to inoculation with PA103 ( $\Delta PcrV$ ). Error bars are the standard error of the mean. The asterisk indicates a significant difference by unpaired *t*-test ( $P < 0.05$ ). **B.** Mock cell culture infection experiments were performed where  $\sim 2.5 \times 10^7$  CFU/mL of each *P. aeruginosa* mutant strain was inoculated into DMEM culture medium (no PMVECs) and bacterial growth followed over time by direct plating. Error bars are the standard error of the mean of technical replicates from at least 3 independent experiments. There were no observable differences in growth rates between the two *P. aeruginosa* mutant strains. **C.** The ability of each of the *P. aeruginosa* mutant strains to adhere to PMVECs was assessed. Isolated rat PMVECs were grown in culture dishes to confluence and inoculated with either *P. aeruginosa* mutant at a 40:1 MOI. At one hour post-inoculation, monolayers were washed copiously to remove planktonic bacteria, PMVECs permeabilized, and total associated bacteria determined by direct plating. Error bars are the standard error of the mean of technical replicates from at least 3 independent experiments. There were no observable differences in adherence to PMVECs between the two *P. aeruginosa* mutant strains.

doi: 10.1371/journal.pone.0081792.g003

as a sensitive index of vascular endothelial cell barrier integrity (i.e., the extent of perfusate fluid leakage into the lung tissue) [64]. Figure 2C shows that the lungs from animals infected with PA103 ( $\Delta U/\Delta T$ ) displayed a significant increase in  $K_f$  compared to saline-treated or PA103 ( $\Delta PcrV$ )-infected animals. These data suggest that the presence of a functional T3SS needle tip complex in PA103 ( $\Delta U/\Delta T$ ) contributes to *P. aeruginosa*-induced lung injury in the absence of secreted effector proteins.

During the Early Phase of Infection, the *P. aeruginosa* PcrV Protein Contributes to PMVEC Barrier Disruption via Perturbation of the Host Actin Cytoskeleton that Occurs in a Cell Death-Independent Manner

The *in vivo* infection data presented thus far revealed a T3SS needle tip complex-dependent, but effector protein-independent mechanism by which *P. aeruginosa* pneumonia elicits hallmark features of ARDS, namely pulmonary edema (Figure 2A), neutrophil infiltration (Figure 2B), and increased fluid filtration (Figure 2C). Importantly, these pathologies are all

indicative of pulmonary endothelial barrier disruption. Thus, we tested an *in vitro* cell culture infection model to further compare the pathogenic potential of the T3SS needle tip complex to cause pulmonary endothelial barrier disruption and have revealed a two-phase, temporal nature of the pathogen-host interaction.

We have previously described the isolation, propagation, and barrier-forming properties of PMVECs derived from rat lung capillaries [65,66] and herein used these cells to test the effects of *P. aeruginosa* infection. During the early phase of infection (5-hours post-inoculation), PA103 ( $\Delta U/\Delta T$ ) induced significant PMVEC barrier disruption measured as an increased rate of fluorescein isothiocyanate-labeled dextran flux (FITC-dextran, 40,000 MW) across a confluent PMVEC monolayer adhered onto a transwell (Figure 3A). Conversely, PMVECs inoculated with PA103 ( $\Delta PcrV$ ) demonstrated a rate of FITC-dextran flux comparable to uninoculated PMVEC controls (Figure 3A).

Visual inspection of the monolayers by time-lapse phase contrast light microscopy was used as a second indicator of cell-to-cell association in confluent PMVEC monolayers during a time-course infection. The same region of the culture well was monitored with time and revealed that PMVECs inoculated with PA103 ( $\Delta U/\Delta T$ ) begin to alter morphology during the early phase of infection (5-hours post-inoculation) compared to PMVECs inoculated with PA103 ( $\Delta PcrV$ ) and uninoculated PMVEC controls (Figure S4).

We have determined that the differences in PMVEC barrier disruption between the two *P. aeruginosa* strains were not due to differences in bacterial growth over the time course as both PA103 ( $\Delta U/\Delta T$ ) and PA103 ( $\Delta PcrV$ ) displayed comparable growth rates (Figure 3B). In addition, both PA103 ( $\Delta U/\Delta T$ ) and PA103 ( $\Delta PcrV$ ) were equally able to adhere to the PMVEC monolayers indicating that the T3SS needle tip complex is not likely a major determining factor of pathogen-host attachment (Figure 3C). Together, these data suggest that the T3SS needle tip complex contributes to *P. aeruginosa*-induced PMVEC barrier disruption during the early phase of infection.

Interestingly, the observed early phase of PMVEC barrier disruption induced by PA103 ( $\Delta U/\Delta T$ ) was not attributable to infection-induced host cell death as measured by Trypan Blue exclusion assay (Figure 4A), nor were there any measurable TUNEL-positive staining cells (data not shown). Inoculation of PMVECs with PA103 ( $\Delta PcrV$ ) also did not significantly affect host cell viability (Figure 4A and data not shown). In addition, while both PA103 mutants caused measurable rates of LDH release, the amounts were negligible. (Figure 4B). These data suggest that while PA103 ( $\Delta U/\Delta T$ ) infection induces cell damage, the primary mechanism of early phase PMVEC barrier disruption occurs in a host cell death-independent manner.

Actin cytoskeletal rearrangements and perturbations have been implicated in other model systems as a critical, cell death-independent mechanism of PMVEC barrier disruption [67,68]. Thus, we examined actin in fixed cells by phalloidin staining and fluorescence confocal microscopy. Figure 4C shows that inoculation of PMVECs with PA103 ( $\Delta U/\Delta T$ ) resulted in actin stress fiber formation compared to PA103 ( $\Delta PcrV$ ) and uninoculated control cells. These data suggest that the T3SS needle tip complex induces early phase PMVEC barrier disruption via perturbation of the host cell actin cytoskeletal network.

#### **During the Late Phase of Infection, the *P. aeruginosa* PcrV Protein Contributes to PMVEC Barrier Disruption via Induction of Host Cell Damage and Death**

Extrapolation of the data in Figure 4B suggests that inoculation with PA103 ( $\Delta U/\Delta T$ ) will result in substantial host cell damage during the late phase of infection (24-hours post-inoculation), compared to PA103 ( $\Delta PcrV$ ). This observation is supported by Figure 5A which shows the increased kinetics of PA103 ( $\Delta U/\Delta T$ )-induced PMVEC barrier disruption during the late phase of infection compared to PA103 ( $\Delta PcrV$ ), measured as a function of the transelectrical resistance (TER) of the monolayer.

Time-lapse phase contrast microscopic analysis of PMVEC monolayers revealed that during the late phase of infection PA103 ( $\Delta U/\Delta T$ ) caused more PMVEC damage and loss of cell-to-cell adhesion compared to inoculation with PA103 ( $\Delta PcrV$ ) and uninoculated PMVEC controls (Figure S4). These data suggest that the presence of a functional T3SS needle tip complex in PA103 ( $\Delta U/\Delta T$ ) contributes to late phase PMVEC barrier disruption and loss of cell-to-cell adhesion. These associated changes occurred over a protracted time course compared to what has been previously reported for strains that deploy the ExoU PLA<sub>2</sub> secreted effector (we have confirmed this using the wild type PA103 strain, data not shown).

To better understand the mechanisms underlying the observed T3SS needle-tip complex-dependent barrier disruptive effects during the late phase of infection we examined PMVEC viability and metabolic function. Figure 5B shows that PA103 ( $\Delta U/\Delta T$ ) caused significantly more PMVEC death compared to inoculation with PA103 ( $\Delta PcrV$ ) and uninoculated PMVEC controls as assessed by Trypan Blue exclusion assay. Furthermore, analysis of cell death by TUNEL staining revealed a population of TUNEL-positive cells (Figures 5C and 5S).

Finally, as an index of cellular fitness, PMVEC metabolic function was determined using WST-1, which measures cellular red-ox state. Figure 5D shows that during the late phase of inoculation with a *P. aeruginosa* strain encoding a functional T3SS needle tip complex [PA103 ( $\Delta U/\Delta T$ )], the metabolic fitness of PMVECs is severely impaired compared to inoculation with PA103 ( $\Delta PcrV$ ) and uninoculated PMVEC controls. Together, these data suggest that the presence of a functional T3SS needle tip complex in PA103 ( $\Delta U/\Delta T$ ) contributes to *P. aeruginosa*-induced barrier disruption via effects on PMVEC metabolic function and viability.

## **Discussion**

The studies presented herein describe a previously unappreciated role for the *P. aeruginosa* T3SS needle tip complex in the elicitation of pneumonia-induced lung injury and ARDS that occur independently of the four known secreted effector proteins. While the *P. aeruginosa* T3SS needle tip complex has been implicated as a virulence factor in animal infection models and in stimulating recruitment and cell death in immune cells to drive damaging inflammatory responses [4,21,44,45,51–53], ours is the first study to reveal the deleterious effects associated with lung endothelial barrier and systemic organ dysfunction.

Using a rat lung airway infection model, we have shown that a *P. aeruginosa* strain possessing a functional T3SS needle tip complex but devoid of the four known effector proteins is able to: 1) elicit neutrophil infiltration; 2) cause lung damage, alveolar edema/collapse, and increased permeability; and 3) cause damage sufficient to elicit dysfunction of at least two other organ systems. Deletion of the gene encoding the T3SS needle tip complex protein PcrV severely attenuated the three above-mentioned deleterious effects during infection of the lung.

## Figure 4

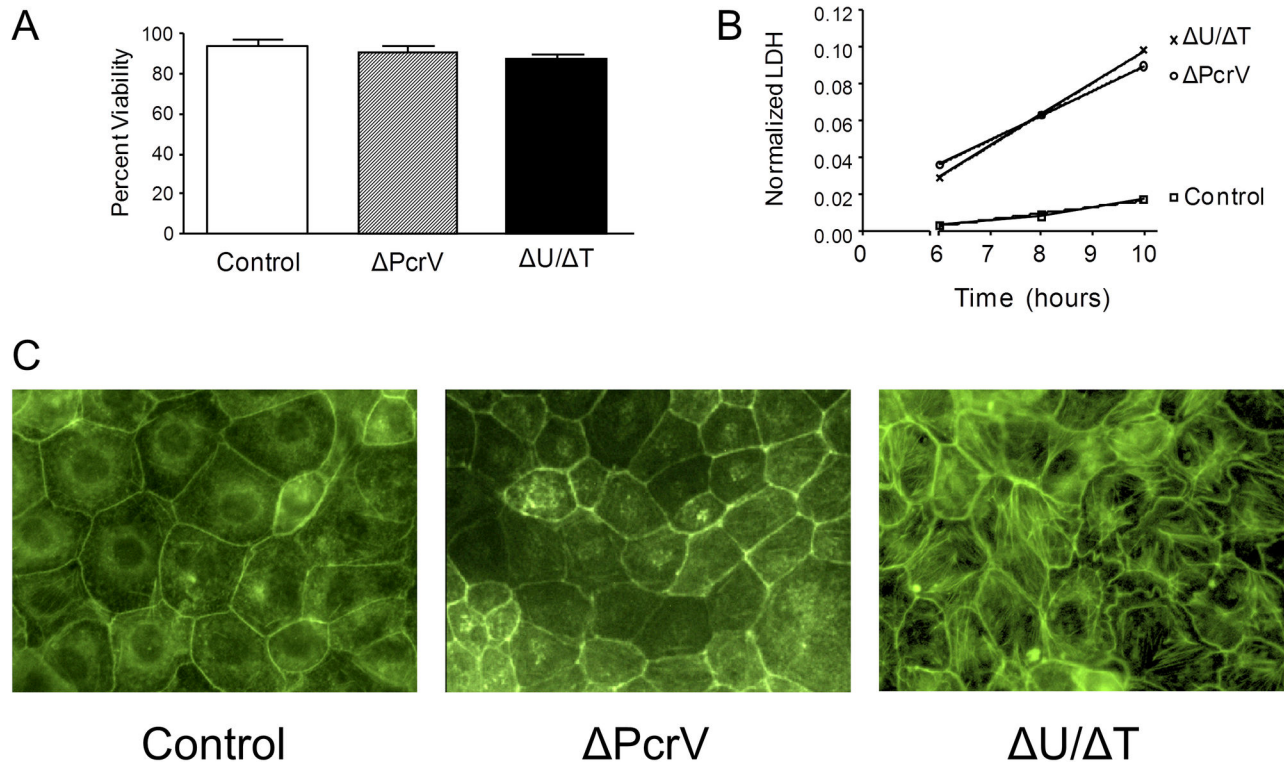

**Figure 4. *P. aeruginosa* T3SS needle tip complex protein PcrV elicits increased PMVEC permeability during early phase infection via cytoskeletal perturbation in a host cell death-independent manner.** **A.** Isolated rat PMVECs were grown in culture dishes to confluence and viability assessed by Trypan Blue exclusion assay. PMVECs were inoculated with saline solution (vehicle control), or with either *P. aeruginosa* mutant at a 40:1 MOI. PMVEC viability was assessed at 5-hours post-inoculation, and data are expressed as percent total viable cells. Neither PA103 mutant caused significant cell death compared to vehicle control-treated PMVECs. The average viable PMVEC numbers from at least 3 independent experiments per condition are presented. Error bars are the standard error of the mean. **B.** Isolated rat PMVECs were grown in culture dishes to confluence and damage assessed by LDH extracellular release assay. PMVECs were inoculated with saline solution (vehicle control), or with either *P. aeruginosa* mutant at a 40:1 MOI. PMVEC damage was assessed over a time course post-inoculation. Culture medium was sampled to measure extracellular LDH and data normalized to the total monolayer (intracellular) LDH. While measurable, compared to vehicle control-treated PMVECs, both PA103 mutants caused only negligible rates of LDH release. The average amounts of extracellular LDH from at least 3 independent experiments are presented. **C.** Isolated rat PMVECs were grown on cover slips to confluence and actin cytoskeleton was visualized by FITC-phalloidin staining. Z-stacks from whole cellular volume images were acquired via confocal fluorescence microscopy. PMVECs were inoculated with saline solution (vehicle control), or with either *P. aeruginosa* mutant at a 40:1 MOI. Inoculation with PA103 ( $\Delta$ U/ $\Delta$ T) mutant caused evident cytoskeletal rearrangement (stress fibers) compared to vehicle control and PA103 ( $\Delta$ PcrV) inoculation.

doi: 10.1371/journal.pone.0081792.g004

Using a lung endothelial cell culture infection model, we have elucidated a two-phase, temporal nature of *P. aeruginosa* infection of PMVECs. Specifically, a *P. aeruginosa* strain possessing a functional T3SS but devoid of known effector proteins caused early phase barrier disruption (5-hours post-inoculation) by inducing actin cytoskeletal rearrangement, but without accompanying host cell death. A functional T3SS needle tip complex PcrV protein was essential to elicit early phase barrier disruption. Perturbations of the PMVEC actin

cytoskeleton, including the formation of stress fibers as observed here, have been previously reported as an important determinant of PMVEC barrier disruption [67,68]. Future studies will be aimed at uncovering the host cell signaling pathways specifically disrupted or activated by a functional *P. aeruginosa* T3SS needle tip complex.

Hallmarks of late phase barrier disruption (24-hours post-inoculation) included damage and destruction of confluent PMVEC monolayers, loss of cell-to-cell adhesion, and were



## Figure 5

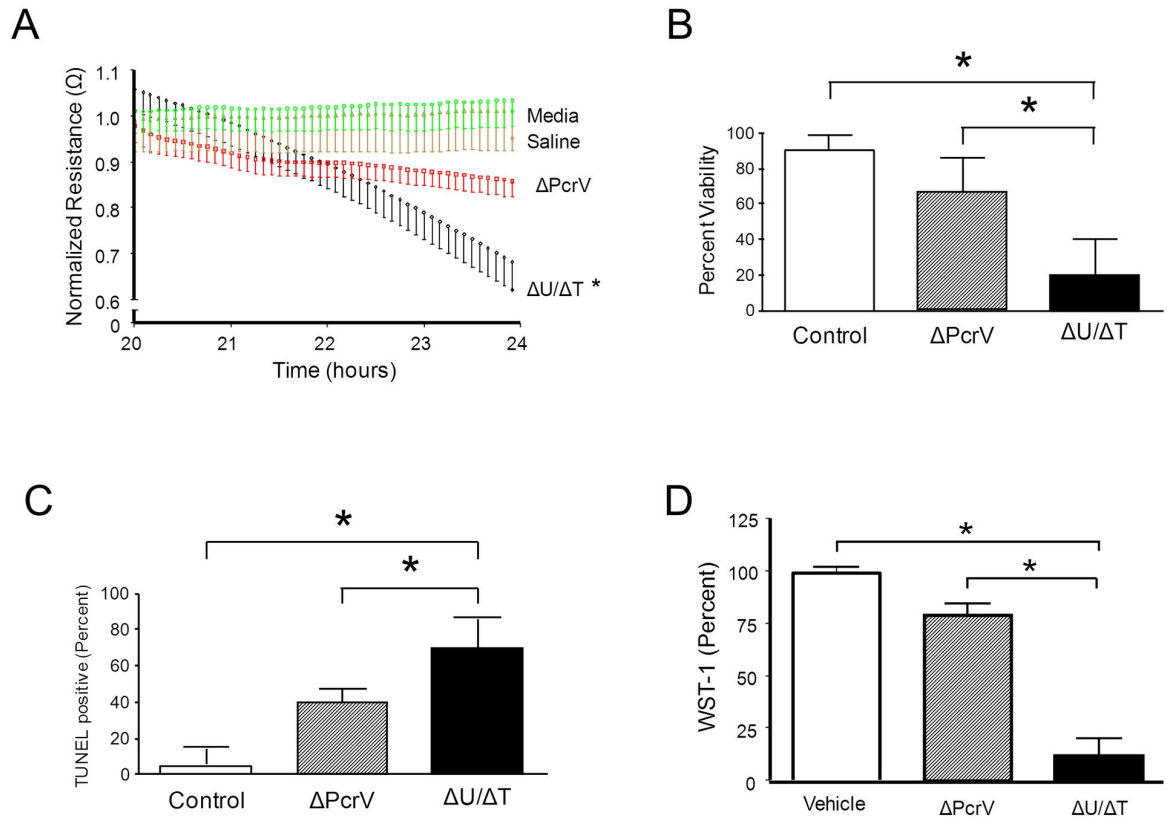

**Figure 5. *P. aeruginosa* T3SS needle tip complex protein PcrV increases PMVEC permeability associated with cell damage during late phase infection.** **A.** Isolated rat PMVECs were grown on gold electrodes to confluence and resistance across the monolayer determined using an ECIS system. PMVECs were inoculated with medium alone, saline solution (vehicle control), or with either *P. aeruginosa* mutant at a 40:1 MOI. Inoculation with PA103 ( $\Delta U/\Delta T$ ) caused significant increases in PMVEC permeability (i.e., decreased electrical resistance) compared to no treatment (medium alone), vehicle control inoculation, or inoculation with PA103 ( $\Delta PcrV$ ). The average numbers of resistance recordings from at least 6 independent experiments per condition are presented. Error bars are the standard error of the mean. The asterisk indicates that PA103 ( $\Delta U/\Delta T$ ) was significantly different compared to all other conditions ( $P < 0.05$ ) by one-way ANOVA and Newman-Keuls *post-hoc* test. **B.** Isolated rat PMVECs were grown in culture dishes to confluence and viability assessed by Trypan Blue exclusion assay. PMVECs were inoculated with saline solution (vehicle control), or with either *P. aeruginosa* mutant at a 40:1 MOI. PMVEC viability was assessed at 24-hours post-inoculation, and data are expressed as percent total viable cells. Inoculation with PA103 ( $\Delta U/\Delta T$ ) significantly increased PMVEC death compared to vehicle control inoculation and PA103 ( $\Delta PcrV$ ). The average viable PMVEC numbers from at least 10 independent experiments per condition are presented. Error bars are the standard error of the mean. The asterisks indicate that PA103 ( $\Delta U/\Delta T$ ) was significantly different compared to all other conditions ( $P < 0.05$ ) by one-way ANOVA and Newman-Keuls *post-hoc* test. **C.** Isolated rat PMVECs were grown on glass cover slips to confluence and cell death assessed by TUNEL staining. PMVECs were inoculated with saline solution (vehicle control), or with either *P. aeruginosa* mutant at a 40:1 MOI. PMVEC death was assessed at 24-hours post-inoculation, and numbers of dead cells are expressed as a percent of the total number of cells. Inoculation with PA103 ( $\Delta U/\Delta T$ ) significantly increased PMVEC death compared to vehicle control inoculation and PA103 ( $\Delta PcrV$ ). Error bars are the standard error of the mean from 3 independent experiments. The asterisks indicate that PA103 ( $\Delta U/\Delta T$ ) was significantly different compared to all other conditions ( $P < 0.05$ ) by one-way ANOVA and Newman-Keuls *post-hoc* test. **D.** Isolated rat PMVECs were grown in culture dishes to confluence and cellular fitness assessed by WST-1 metabolism assay. PMVECs were inoculated with saline solution (vehicle control), or with either *P. aeruginosa* mutant at a 40:1 MOI. PMVECs were assessed at 24-hours post-exposure for each condition, and data are expressed as percent of the vehicle control. Infection with PA103 ( $\Delta U/\Delta T$ ) significantly decreased PMVEC fitness compared to vehicle control inoculation and PA103 ( $\Delta PcrV$ ). The average amount of WST-1 metabolism from at least 5 independent experiments per condition is presented. Error bars are the standard error of the mean. The asterisks indicate that PA103 ( $\Delta U/\Delta T$ ) was significantly different compared to all other conditions ( $P < 0.05$ ) by one-way ANOVA and Newman-Keuls *post-hoc* test.

doi: 10.1371/journal.pone.0081792.g005

attributable to deleterious effects of infection on cellular fitness and viability. Deletion of the gene encoding the T3SS needle tip complex protein PcrV attenuated late phase barrier disruptive effects. The fact that there were high numbers of both, Trypan Blue- and TUNEL-positive cells suggested that PcrV-dependent cell death is a major contributor to PMVEC demise during late stages of infection. Thus, during the late stages of infection, cell-death dependent mechanisms elicited by the T3SS needle tip complex might be similar between PMVECs and immune cells where apoptosis was previously shown to be a major contributor to pathobiology in a murine infection model [36].

Our studies raise the intriguing questions of whether engagement of infected eukaryotic cells by the T3SS needle tip complex elicits damage directly or whether the translocation of unknown effector proteins is responsible for the observed deleterious effects. The damaging effects of the T3SS needle tip complex are inferred from red blood cell hemolysis assays describing its pore-forming capacity [55,69]. Interestingly, the extrapolated amount of LDH release from PMVECs during the late phase of infection suggested that the T3SS needle tip complex might be inducing cell damage and lysis. However, the reported T3SS needle tip complex-dependent hemolysis of red blood cells occurs over a much shorter time course than that required to damage PMVECs in our experiments and, thus, we can not entirely preclude a contribution of unknown effectors/hemolysins.

Another possible mechanism of T3SS needle tip complex-induced cellular damage/death during the late phase of infection is engagement of inflammasomes and activation of caspase-1. Families of germ-line encoded Pattern Recognition Receptor (PRR) proteins sense and respond to extracellular and intracellular signals that accompany infections [70–72]. In particular, the Nucleotide Oligomerization Domain-Like Receptors (NLRs) have emerged as important PRRs that mediate caspase-1 activation. Caspase-1 and NLRs assemble with scaffolding proteins to form inflammasomes – complexes that respond to environmental signals to stimulate caspase-1 activation. The T3SS itself has been shown to engage inflammasomes [73] in addition to bacterial proteins such as flagellin [70,73,74] (note that the PA103 strain used in our studies does not express flagellin). One consequence of caspase-1 activation is initiation of pyroptosis, a rapid form of programmed cell death described in immune cells [72]. However, there are no studies describing inflammasome function or caspase-1-mediated pyroptosis in PMVECs. We are currently examining this possibility in PMVECs and our preliminary, unpublished studies suggest that PMVEC inflammasome activation does not lead to induction of pyroptosis.

While mechanisms underlying the deleterious effects of the T3SS needle tip complex on lung and PMVEC function are unclear, the current evidence highlights an evolutionary importance of this molecular machinery in pathogen virulence. An extensive study of *P. aeruginosa* clinical isolates revealed that the presence of a T3SS and either of the ExoU or ExoS effector proteins correlated with severity of outcome [4]. Interestingly, clinical isolates encoding only PcrV correlated

with more severe outcomes compared to patients infected with strains lacking a functional T3SS. Together these data suggest a possible pathway of evolutionary acquisition of virulence factors that were subverted from their original function in bacteria cellular physiology to facilitate colonization of new niches (such as humans). Just as the restriction endonuclease systems likely evolved to protect the bacterium from invading foreign nucleic acids, perhaps the ancestral T3SS endowed a selective advantage by jettisoning potentially toxic protein products encoded by invading foreign genetic elements. This idea is suggested by the fact that many examples of T3SSs and their effectors reside in pathogenicity islands which tend to possess a different AT:GC ratio than the core bacterial genome, suggesting their acquisition via horizontal gene transfer. These intriguing evolutionary questions and the clinical relevance to combating *P. aeruginosa* pneumonia-induced ARDS underscore the need for future studies directed at furthering our understanding of the direct role of the T3SS needle tip complex in pathogen-host interactions and cellular viability/damage. Furthermore, it will be necessary to determine whether *P. aeruginosa* isolates expressing the ExoS effector (i.e., non-PA103-like strains) also employ the T3SS needle tip complex as an effector-independent virulence factor.

## Materials and Methods

### Ethics Statement

This study was carried out in accordance with the recommendations in the Guide for the Care and Use of Laboratory Animals of the National Institutes of Health. The experimental protocol was approved by the University of South Alabama IACUC (protocol number 278188). All surgeries were performed after confirming that animals had achieved anesthetic plane and all efforts were made to minimize suffering. For the survival studies described herein, animals were humanely euthanized when they exhibited signs of high respiratory distress or by direct recommendation of the veterinarian. For all other studies, control and infected animals were humanely euthanized within 72-hours post inoculation. Animals were euthanized with a barbiturate overdose followed by exsanguination, a procedure conforming to recommendations from the veterinarian panel of euthanasia and the IACUC.

### Bacterial Strains and Growth

The *P. aeruginosa* strains used in this study were kindly provided by Dr. Dara Frank (Medical College of Wisconsin). The wild type PA103 is a clinical isolate that expresses a functional T3SS and the effector proteins ExoU and ExoT (PA103 does not encode the effector proteins ExoS and ExoY). PA103 ( $\Delta U/\Delta T$ ) is an isogenic PA103 mutant deleted for *exoU* and possessing a tetracycline resistance cassette inserted into *exoT* (PA103  $\Delta exoU::exoT::Tc$ ) but expresses a fully functional T3SS [75]. PA103 ( $\Delta PcrV$ ) is an isogenic PA103 mutant that possesses functional *exoU* and *exoT* genes but is deleted for the *pcrV* gene (PA103  $\Delta pcrV$ ) and, thus cannot form a functional T3SS needle tip complex. PA103 ( $\Delta PcrV$ ) is unable to inject ExoU and ExoT into eukaryotic host cells and instead,

the effector proteins are secreted indiscriminately into the culture medium [63].

Bacteria from frozen stock solutions (Difco Nutrient Broth medium with 15% glycerol, stored at  $-80^{\circ}\text{C}$ ) were routinely cultured on the minimal E salts medium of Vogel and Bonner overnight at  $37^{\circ}\text{C}$ . Immediately prior to use in infection experiments, bacteria were washed in 10 mL of normal saline solution (SS), collected by centrifugation (4000  $\times g$ , 10 minutes, at room temperature), and suspended in SS. The correlation between OD 600<sub>nm</sub> and relative CFU/mL for all three bacterial strains was determined by serial dilution and direct plate counts on Luria Bertani (LB) agar (grown overnight at  $37^{\circ}\text{C}$ ), and spectrophotometry used for CFU/mL determinations in animal and cell culture infection experiments thereafter.

### Rat Airway Infection Experiments

Adult, male CD rats were purchased from Charles River Laboratories. Animals weighing between 275 - 300 grams were anesthetized with ketamine/xylazine (75/5 mg/kg intraperitoneally, respectively). After confirming anesthetic plane, the ventral neck area of the animal was prepared with 70 % ethanol, an incision of 2 cm length was made, the sternomastoid muscles were retracted, and the trachea exposed. The animal was positioned at a  $75^{\circ}$  Fowler's angle and a 27-gauge needle inserted in between tracheal rings immediately below the thyroid gland to inject 150  $\mu\text{L}$  SS delivered caudally. After 3-minutes post inoculation, the skin was sutured and the animal transferred to a clean cage for recovery. These were considered control, sham surgery animals. Infected animals underwent the same procedure except that the 150  $\mu\text{L}$  SS contained any one of the three aforementioned *P. aeruginosa* strains (prepared as described above) at the concentrations described in the results section. This protocol was used to generate the one-week survival dose response and Kaplan-Meier curves.

At 48-hours post-infection, body temperature was measured rectally in anesthetized animals. A microtipped pressure-volume catheter (1.4 Fr, Millar instruments) was advanced through the carotid artery and used to measure ventricular function (dP/dt). Peripheral blood was subsequently collected and analyzed for total and differential white cell counts, aspartate aminotransferase (AST), and creatinine. CFUs were determined from peripheral blood and lung tissue by direct plate counts on Luria Bertani (LB) agar (grown overnight at  $37^{\circ}\text{C}$ ).

### Lung Histopathology

Terminal experiments were performed in control or infected animals anesthetized as described above. Animals were mechanically ventilated (Harvard Inspira 55-7058) with 6 mL of room air per kg body weight at 55 breaths per minute and 2  $\text{cmH}_2\text{O}$  positive end expiratory pressure. Following a thoracotomy, the trachea was tied-off at the peak of inspiration, the lungs removed, and then immersed in 10 % neutral buffered formalin solution. Lung specimens were embedded in paraffin and processed for hematoxylin and eosin (H&E) staining. Sections at 5  $\mu\text{m}$  thickness were visualized on a Nikon

coupled to a CCD camera and images acquired at 10x and 20x magnification.

An independent set of lung sections from the same animals were stained for myeloperoxidase (MPO) to facilitate enumeration of infiltrating neutrophils following the protocol previously described in [76]. The average numbers of MPO positive cells from at least 5 independent fields of view from three different animals per condition are presented.

### Lung Hydraulic Permeability

Terminal experiments were performed in control or infected animals anesthetized and ventilated as described above. Following a thoracotomy, the pulmonary artery and the left atrium were cannulated and constant perfusion initiated with Earle's Buffered Salt Solution containing 4% bovine serum albumin (EBSS 4% BSA). The solution pH was adjusted to 7.4 using  $\text{NaHCO}_3$ . The lung and heart were removed *en bloc*, and suspended in a force transducer. Pulmonary venous and arterial pressures, and lung weight were digitally recorded using a Biopac System (AD Instruments). Flow rates were adjusted based on animal weight and venous pressure set at 5  $\text{cmH}_2\text{O}$  [64]. After 10 minutes of perfusion, pulmonary capillary pressure was measured (baseline) via double occlusion, venous pressure was then raised to 15  $\text{cmH}_2\text{O}$  for 15 minutes and capillary pressure measured to calculate its change compared to baseline. Lung hydraulic permeability is calculated as the normalized rate of lung weight gain over the change in capillary pressure during the last 2 minutes of elevated venous pressure and expressed as  $K_f$ .

### Propagation and Infection of PMVECs *in vitro* for Barrier Assays

PMVECs from CD rats were isolated and characterized as previously described [65], and made available for our studies through the University of South Alabama Center for Lung Biology Cell Culture Core. Low passage number cells (<15) were routinely cultured in DMEM high glucose medium (Invitrogen) containing 10% fetal bovine serum (DMEM/FBS) and grown at  $37^{\circ}\text{C}$ , (5%  $\text{CO}_2$ , atm  $\text{O}_2$ ) to confluence prior to infection.

The early phase effects (5-hours post-inoculation) of the T3SS needle tip complex on PMVEC barrier function were examined using a fluorescein isothiocyanate (FITC)-dextran flux assay. PMVECs in DMEM culture medium containing 1% FBS were seeded onto polycarbonate transwell filters (0.4  $\mu\text{m}$  pore size, 6.5 mm insert) at  $1.3 \times 10^5$  cells per well and incubated overnight to give a final cell density of  $\sim 2.6 \times 10^5$  cells per well (confluence) at the time of inoculation. *P. aeruginosa* PA103 ( $\Delta\text{U}/\Delta\text{T}$ ) or PA103 ( $\Delta\text{PcrV}$ ) were then added to individual wells to achieve a multiplicity of infection (MOI) of 40 bacteria: 1 PMVEC (SS was added to individual wells as the vehicle control). At 4-hours post inoculation, FITC-dextran (40,000 MW from Sigma, 0.1 mg/mL in DMEM 1% FBS culture medium) was added to each transwell chamber. The transwell chambers were then moved to new bottom wells containing fresh DMEM 1% FBS culture medium and samples removed at 15-, 30-, 45-, and 60-minutes, and stored protected from light until the end of the assay. The amount of FITC-dextran flux

across the monolayer was determined by measuring fluorescent signal from the medium in the bottom well on a NanoDrop Fluorospectrometer ND-330 (ThermoScientific) using an excitation wavelength of 488 nm  $\pm$  10 nm and an emission wavelength of 515 nm. Increases in the rate of FITC-dextran flux across the monolayer are indicative of PMVEC barrier disruption. Average flux rate data from the SS vehicle control transwells were used to normalize the flux rate from duplicate inoculations with PA103 ( $\Delta U/\Delta T$ ) or PA103 ( $\Delta PcrV$ ) ( $n=3$  for each condition).

The late phase effects (24-hours post-inoculation) of the T3SS needle tip complex on PMVEC barrier function were examined using the transelectrical resistance (TER) assay. PMVECs were seeded onto gold electrodes at  $4.5 \times 10^4$  cells per well, grown for 2-days to a final concentration of  $4.0 \times 10^5$  cells per well (confluence), and the baseline resistance across the monolayer determined using the Electric Cell-substrate Impedance Sensing system (Applied Biophysics) as previously described [77]. *P. aeruginosa* PA103 ( $\Delta U/\Delta T$ ) or PA103 ( $\Delta PcrV$ ) at an MOI of 40:1 were then added to individual wells and monolayer resistance monitored in real time over a 24-hour time course (SS was added to individual wells as the vehicle control). The resistance of the confluent monolayer prior to challenge was used to normalize all subsequent resistance values acquired post-challenge. A decrease in resistance with time is indicative of barrier disruptive effects of infection.

To examine PMVEC barrier function by time-lapse phase contrast microscopy, cells were seeded as described above. Medium was removed from the well and replaced with DMEM without FBS followed by addition of bacteria to individual wells at a MOI of 40:1 (SS was added to individual wells as a vehicle control). A single region of the culture well was marked and images from the same area were serially captured by phase contrast microscopy over a 24-hour time course. Still images are shown at early phase infection (5-hours post-inoculation) and at late phase infection (24-hours post-inoculation). Increased PMVEC rounding, appearance of intercellular gap formation (loss of cell-to-cell adhesion), and appearance of fully exposed areas due to cell sloughing are indicators of the barrier disruptive effects of infection.

### ***P. aeruginosa* Growth Rates and Adherence to PMVECs *in vitro***

Growth rate of *P. aeruginosa* strains under the static cell culture infection conditions was determined by removing aliquots over time and counting bacteria by serial dilution in SS and direct plate counts on LB agar (grown overnight at 37 °C).

Adherence of *P. aeruginosa* strains to PMVECs during cell culture infection experiments was determined at 1-hour post-infection. At that time, the culture medium was removed and wells washed 2-times with 5 mL of DMEM. A third wash with 1 mL of DMEM was performed and 0.1 mL of this wash solution plated onto LB agar to assess the efficiency of removing the unattached bacteria. Finally, monolayers were lysed with 1 mL of 0.1% Triton X-100 to release all associated bacteria. Bacterial numbers were determined in triplicate by direct plate counts of 0.1 mL of lysate onto LB agar (grown overnight at 37

°C). We also verified that the addition of 0.1% Triton X-100 had no adverse effects on *P. aeruginosa* plating efficiency.

### **Infection of PMVECs *in vitro* for Viability Assays**

To examine changes in cell viability at early (5-hours post-inoculation) phase of infection, PMVECs were grown to confluence and inoculated as described above. At the times indicated, medium was removed, wells washed with phosphate buffered saline (PBS, Invitrogen), incubated for 5-minutes with trypsin-EDTA (Invitrogen) to free cells from the well, the trypsin-EDTA removed by washing in DMEM/FBS and centrifugation (500  $\times g$ , 4-minutes, at room temperature), cells stained with Trypan Blue, and live/dead cells enumerated using a Countess Automated Cell Counter as per the manufacturer's directions (Invitrogen). Only the dead cells take up the dye. The numbers of live and dead cells in the SS vehicle control wells were used to normalize data from the various infection conditions.

As a second measure of cellular death, TUNEL staining was performed on PMVECs grown and inoculated with saline solution (vehicle control), PA103 ( $\Delta PcrV$ ), or PA103 ( $\Delta U/\Delta T$ ) as above except that cells were adhered to glass cover slips placed sterily onto the bottom of the culture well. At 5- or 24-hours post-inoculation, PMVECs were permeabilized in phosphate buffered saline solution (PBS) containing 0.15% Triton X-100. TUNEL staining (indicative of late apoptotic cells) was performed using FITC-conjugated TUNEL labeling reagent following the manufacturer's instructions (Roche). After TUNEL staining, slides were incubated with antibody against PECAM-1 (CD31), washed in PBS, and then incubated with an Alexa Fluor560-conjugated secondary antibody. Images were acquired by confocal fluorescent microscopy using a Nikon A1 equipped for hyperspectral imaging [78]. Post-acquisition image analysis for quantification of TUNEL-positive cells was performed using Cell Profiler cell image analysis software (Broad Institute) where 9 consecutive fields of view per slide were stitched together and the total number of TUNEL-positive cells normalized to the total number of PECAM-1-positive cells. Data were collected in this manner from 3 independent experiments.

### **Infection of PMVECs *in vitro* for Visualization of the Actin Cytoskeleton**

To examine changes in the host cell actin cytoskeleton, phalloidin staining was performed on PMVECs grown and inoculated with saline solution (vehicle control), PA103 ( $\Delta PcrV$ ), or PA103 ( $\Delta U/\Delta T$ ) as above except that cells were adhered to glass coverslips. At 5-hours post-inoculation, PMVECs were permeabilized in PBS containing 0.05% saponin, washed in PBS, incubated in FITC-labeled phalloidin (Life Technologies), washed in PBS, and fixed using chilled methanol (-20 °C). Slides were mounted using Antifade mounting medium (Dako) and images were acquired by confocal fluorescent microscopy using a Nikon A1. Z-stack images encompassing the entire cell volume were acquired and compressed. Data were collected in this manner from 3 independent experiments.

### Infection of PMVECs *in vitro* for Damage and Metabolism Assays

To examine changes in cellular damage, PMVECs were grown to confluence and inoculated with saline solution (vehicle control), PA103 ( $\Delta$ PcrV), or PA103 ( $\Delta$ U/ $\Delta$ T). At the times indicated, culture medium was serially removed and the amount of host cell lactate dehydrogenase (LDH) released was assayed using a cytotoxicity detection kit as per the manufacturer's directions (Roche). The amount of LDH detected in the culture medium was normalized to the total cellular LDH in lysed, uninfected control monolayers. Data were collected in this manner from 3 independent experiments.

To examine changes in the cellular red-ox state in response to infection the PMVEC culture infection experiments described above were scaled down to a 96-well format. At 24-hours post-infection, the WST-1 reagent was added to the wells for 1-hour and visualized by spectrophotometry as per the manufacturer's direction (Roche). Growing cells metabolize the WST-1 dye resulting in proportional changes in medium color. The extent of WST-1 metabolism in the infected wells was normalized to the SS vehicle control wells. Data were collected in this manner from 5 independent experiments.

### Statistical Analyses

Data are reported as mean  $\pm$  standard error. GraphPad Prism v4.3 was used for all analyses. Comparison among groups was performed using parametric analyses. Unpaired *t*-test was used to compare two groups. One-way ANOVA was used to compare more than two groups with a Newman-Keuls *post-hoc* test applied as necessary. Differences with a P value  $< 0.05$  were considered significant.

### Supporting Information

**Figure S1. *P. aeruginosa* infection causes liver injury in a rat model of lung infection.** Histological hematoxylin and eosin image of control liver and from animals inoculated with PA103, PA103 ( $\Delta$ PcrV), and with PA103 ( $\Delta$ U/ $\Delta$ T). Arrows point to regions with significant peri-portal inflammation only in animals inoculated with the wild type PA103 and PA103 ( $\Delta$ U/ $\Delta$ T) indicating that the presence of a functional T3SS needle tip complex is sufficient to elicit injury. These data are consistent with the observed elevated biomarkers of liver injury (see Table 1). (TIF)

**Figure S2. *P. aeruginosa* infection causes kidney injury in a rat model of lung infection.** Histological hematoxylin and eosin image of control kidney and from animals inoculated with PA103, PA103 ( $\Delta$ PcrV), and with PA103 ( $\Delta$ U/ $\Delta$ T). White arrows point to glomeruli as a point of reference. Black arrows point to tubular cast indicative of sepsis-induced injury that was observed only in animals inoculated with the wild type PA103. (TIF)

**Figure S3. *P. aeruginosa* T3SS needle tip complex protein PcrV associates with lung injury.** Macroscopic images of

lungs at 48-hours post-inoculation. The left panel shows digital images of lungs from an animal inoculated with saline solution (vehicle control), the middle panel from an animal inoculated with  $\sim 1 \times 10^7$  CFUs of PA103 ( $\Delta$ PcrV), and the right panel from an animal inoculated with  $\sim 1 \times 10^7$  CFUs of PA103 ( $\Delta$ U/ $\Delta$ T). PA103 ( $\Delta$ U/ $\Delta$ T) caused more gross damage to the lung compared to PA103 ( $\Delta$ PcrV). (TIF)

**Figure S4. *P. aeruginosa* T3SS needle tip complex protein PcrV associates with PMVEC barrier disruption.** Isolated rat PMVECs were grown in culture dishes to confluence and monolayer integrity was assessed by time-lapsed light microscopy. PMVECs were inoculated with saline solution (Vehicle control), or with either *P. aeruginosa* mutant at a 40:1 MOI. Exposures of the same region of the culture dish were obtained pre-exposure, at 5-6-hours, and at 24-hours post-inoculation. PMVECs inoculated with PA103 ( $\Delta$ U/ $\Delta$ T) begin to alter morphology during the early phase of infection (5-hours post-inoculation) compared to PMVECs inoculated with PA103 ( $\Delta$ PcrV) and uninoculated PMVEC controls. During the late phase of infection PA103 ( $\Delta$ U/ $\Delta$ T) caused more PMVEC damage and loss of cell-to-cell adhesion compared to inoculation with PA103 ( $\Delta$ PcrV) and uninoculated PMVEC controls. The PA103 ( $\Delta$ PcrV) mutant also caused barrier disruption, but in a protracted fashion. Representative images are shown. Experiments were repeated at least 10 times per condition. (TIF)

**Figure S5. *P. aeruginosa* T3SS needle tip complex protein PcrV associates with PMVEC cell death during the late phase of infection.** Isolated rat PMVECs were grown on glass cover slips to confluence and cell death was assessed by TUNEL staining and visualized via confocal fluorescence microscopy and hyperspectral imaging. PMVECs were inoculated with saline solution (vehicle control), or with either *P. aeruginosa* mutant at a 40:1 MOI. Slides were prepared for staining at 24-hours post-inoculation. PMVECs were stained with antibody against PECAM-1 (CD31, green pseudocolor) and TUNEL positive cells shown in red pseudocolor. PMVECs inoculated with PA103 ( $\Delta$ U/ $\Delta$ T) display significant number of TUNEL-positive cells compared to PMVECs inoculated with PA103 ( $\Delta$ PcrV) and uninoculated PMVEC controls. (TIF)

### Acknowledgements

the authors would like to thank Linn Ayers of the University of South Alabama Center for Lung Biology Cell Culture Core for her assistance in maintaining the cultured cells used in this study.

### Author Contributions

Conceived and designed the experiments: JPA DFA. Performed the experiments: JPA ASL NAH CRO CZ MT NSA MSF DFA. Analyzed the data: JPA DFA. Contributed reagents/

materials/analysis tools: DWF MO. Wrote the manuscript: JPA DFA.

## References

- Chastre J, Fagon JY (2002) Ventilator-associated pneumonia. *Am J Respir Crit Care Med* 165: 867-903. doi:10.1164/ajrccm.165.7.2105078. PubMed: 11934711.
- Kurahashi K, Kajikawa O, Sawa T, Ohara M, Gropper MA et al. (1999) Pathogenesis of septic shock in *Pseudomonas aeruginosa* pneumonia. *J Clin Invest* 104: 743-750. doi:10.1172/JCI7124. PubMed: 10491409.
- Lynch JP III (2001) Hospital-acquired pneumonia: risk factors, microbiology, and treatment. *Chest* 119: 373S-384S. doi:10.1378/chest.119.2\_suppl.373S. PubMed: 11171773.
- Roy-Burman A, Savel RH, Racine S, Swanson BL, Revadigar NS et al. (2001) Type III protein secretion is associated with death in lower respiratory and systemic *Pseudomonas aeruginosa* infections. *J Infect Dis* 183: 1767-1774. doi:10.1086/320737. PubMed: 11372029.
- Sandiumenge A, Rello J (2012) Ventilator-associated pneumonia caused by ESKAPE organisms: cause, clinical features, and management. *Curr Opin Pulm Med* 18: 187-193. doi:10.1097/MCP.0b013e328351f974. PubMed: 22366995.
- Yu P, Martin CM (2000) Increased gut permeability and bacterial translocation in *Pseudomonas* pneumonia-induced sepsis. *Crit Care Med* 28: 2573-2577. PubMed: 10921597.
- Allmond LR, Ajayi T, Moriyama K, Wiener-Kronish JP, Sawa T (2004) V-antigen genotype and phenotype analyses of clinical isolates of *Pseudomonas aeruginosa*. *J Clin Microbiol* 42: 3857-3860. doi:10.1128/JCM.42.8.3857-3860.2004. PubMed: 15297549.
- Feltman H, Schuler G, Khan S, Jain M, Peterson L et al. (2001) Prevalence of type III secretion genes in clinical and environmental isolates of *Pseudomonas aeruginosa*. *Microbiology* 147: 2659-2669. PubMed: 11577145.
- Garau J, Gomez L (2003) *Pseudomonas aeruginosa* pneumonia. *Curr Opin Infect Dis* 16: 135-143. doi:10.1097/00001432-200304000-00010. PubMed: 12734446.
- Lee VT, Smith RS, Tümmler B, Lory S (2005) Activities of *Pseudomonas aeruginosa* effectors secreted by the Type III secretion system *in vitro* and during infection. *Infect Immun* 73: 1695-1705. doi:10.1128/IAI.73.3.1695-1705.2005. PubMed: 15731070.
- Azghani AO, Idell S, Bains M, Hancock RE (2002) *Pseudomonas aeruginosa* outer membrane protein F is an adhesin in bacterial binding to lung epithelial cells in culture. *Microb Pathog* 33: 109-114. doi:10.1006/mpat.2002.0514. PubMed: 12220987.
- Hassett DJ, Korfhagen TR, Irvin RT, Schurr MJ, Sauer K et al. (2010) *Pseudomonas aeruginosa* biofilm infections in cystic fibrosis: insights into pathogenic processes and treatment strategies. *Expert Opin Ther Targets* 14: 117-130. doi:10.1517/14728220903454988. PubMed: 20055712.
- Rybtke MT, Jensen PO, Højby N, Givskov M, Tolker-Nielsen T et al. (2011) The implication of *Pseudomonas aeruginosa* biofilms in infections. *Inflamm Allergy Drug Targets* 10: 141-157. doi:10.2174/187152811794776222. PubMed: 21314623.
- Heiniger RW, Winther-Larsen HC, Pickles RJ, Koomey M, Wolfgang MC (2010) Infection of human mucosal tissue by *Pseudomonas aeruginosa* requires sequential and mutually dependent virulence factors and a novel pilus-associated adhesin. *Cell Microbiol* 12: 1158-1173. doi:10.1111/j.1462-5822.2010.01461.x. PubMed: 20331639.
- Hritonenko V, Mun JJ, Tam C, Simon NC, Barbieri JT et al. (2011) Adenylate cyclase activity of *Pseudomonas aeruginosa* ExoY can mediate bleb-niche formation in epithelial cells and contributes to virulence. *Microb Pathog* 51: 305-312. doi:10.1016/j.micpath.2011.08.001. PubMed: 21843628.
- Zaas DW, Swan ZD, Brown BJ, Li G, Randell SH et al. (2009) Counteracting signaling activities in lipid rafts associated with the invasion of lung epithelial cells by *Pseudomonas aeruginosa*. *J Biol Chem* 284: 9955-9964. doi:10.1074/jbc.M808629200. PubMed: 19211560.
- Ader F, Le Berre R, Faure K, Gosset P, Epaulard O et al. (2005) Alveolar response to *Pseudomonas aeruginosa*: role of the type III secretion system. *Infect Immun* 73: 4263-4271. doi:10.1128/IAI.73.7.4263-4271.2005. PubMed: 15972518.
- Hauser AR, Cobb E, Bodi M, Mariscal D, Vallés J et al. (2002) Type III protein secretion is associated with poor clinical outcomes in patients with ventilator-associated pneumonia caused by *Pseudomonas aeruginosa*. *Crit Care Med* 30: 521-528. doi:10.1097/00003246-200203000-00005. PubMed: 11990909.
- Auvin S, Collet F, Gottrand F, Husson MO, Leroy X et al. (2005) Long-chain polyunsaturated fatty acids modulate lung inflammatory response induced by *Pseudomonas aeruginosa* in mice. *Pediatr Res* 58: 211-215. doi:10.1203/01.PDR.0000169979.27641.40. PubMed: 16085793.
- Boyer S, Faure K, Ader F, Husson MO, Kipnis E et al. (2005) Chronic pneumonia with *Pseudomonas aeruginosa* and impaired alveolar fluid clearance. *Respir Res* 6: 17. doi:10.1186/1465-9921-6-17. PubMed: 15707485.
- Diaz MH, Hauser AR (2010) *Pseudomonas aeruginosa* cytotoxin ExoU is injected into phagocytic cells during acute pneumonia. *Infect Immun* 78: 1447-1456. doi:10.1128/IAI.01134-09. PubMed: 20100855.
- Faure K, Sawa T, Ajayi T, Fujimoto J, Moriyama K et al. (2004) TLR4 signaling is essential for survival in acute lung injury induced by virulent *Pseudomonas aeruginosa* secreting type III secretory toxins. *Respir Res* 5: 1. doi:10.1186/1465-9921-5-1. PubMed: 15040820.
- Brigham KL, Woolverton WC, Blake LH, Staub NC (1974) Increased sheep lung vascular permeability caused by *pseudomonas* bacteremia. *J Clin Invest* 54: 792-804. doi:10.1172/JCI107819. PubMed: 4430713.
- Bucior I, Mostov K, Engel JN (2010) *Pseudomonas aeruginosa*-mediated damage requires distinct receptors at the apical and basolateral surfaces of the polarized epithelium. *Infect Immun* 78: 939-953. doi:10.1128/IAI.01215-09. PubMed: 20008530.
- Eutamene H, Theodorou V, Schmidlin F, Tondreau V, Garcia-Villar R et al. (2005) LPS-induced lung inflammation is linked to increased epithelial permeability: role of MLCK. *Eur Respir J* 25: 789-796. doi:10.1183/09031936.05.00064704. PubMed: 15863634.
- Ganter MT, Roux J, Su G, Lynch SV, Deutschman CS et al. (2009) Role of small GTPases and alphavbeta5 integrin in *Pseudomonas aeruginosa*-induced increase in lung endothelial permeability. *Am J Respir Cell Mol Biol* 40: 108-118. doi:10.1165/rncmb.2007-0454OC. PubMed: 18703797.
- Lange M, Hamahata A, Enkhbaatar P, Esehie A, Connelly R et al. (2008) Assessment of vascular permeability in an ovine model of acute lung injury and pneumonia-induced *Pseudomonas aeruginosa* sepsis. *Crit Care Med* 36: 1284-1289. doi:10.1097/CCM.0b013e318169ef74. PubMed: 18379256.
- Aird WC (2007) Phenotypic heterogeneity of the endothelium: II. Representative vascular beds. *Circ Res* 100: 174-190. Available online at: doi:10.1161/01.RES.0000255690.03436.ae. PubMed: 17272819.
- Aird WC (2007) Phenotypic heterogeneity of the endothelium: I. Structure, function, and mechanisms. *Circ Res* 100: 158-173. doi:10.1161/01.RES.0000255691.76142.4a. PubMed: 17272818.
- Alvarez DF, Huang L, King JA, ElZarrad MK, Yoder MC et al. (2008) Lung microvascular endothelium is enriched with progenitor cells that exhibit vasculogenic capacity. *Am J Physiol Lung Cell Mol Physiol* 294: L419-L430. PubMed: 18065657.
- Cines DB, Pollak ES, Buck CA, Loscalzo J, Zimmerman GA et al. (1998) Endothelial cells in physiology and in the pathophysiology of vascular disorders. *Blood* 91: 3527-3561. PubMed: 9572988.
- Dudek SM, Jacobson JR, Chiang ET, Birukov KG, Wang P et al. (2004) Pulmonary endothelial cell barrier enhancement by sphingosine 1-phosphate: roles for cortactin and myosin light chain kinase. *J Biol Chem* 279: 24692-24700. doi:10.1074/jbc.M313969200. PubMed: 15056655.
- Garcia AN, Vogel SM, Komarova YA, Malik AB (2011) Permeability of endothelial barrier: cell culture and *in vivo* models. *Methods Mol Biol* 763: 333-354. doi:10.1007/978-1-61779-191-8\_23. PubMed: 21874463.
- Garcia JG, Verin AD, Schaphorst K, Siddiqui R, Patterson CE et al. (1999) Regulation of endothelial cell myosin light chain kinase by Rho, cortactin, and p60(src). *Am J Physiol* 276: L989-L998. PubMed: 10362724.
- Lowe K, Alvarez D, King J, Stevens T (2007) Phenotypic heterogeneity in lung capillary and extra-alveolar endothelial cells. Increased extra-alveolar endothelial permeability is sufficient to decrease compliance. *J Surg Res* 143: 70-77. doi:10.1016/j.jss.2007.03.047. PubMed: 17950075.
- Galle M, Jin S, Bogaert P, Haegman M, Vandenabeele P et al. (2012) The *Pseudomonas aeruginosa* type III secretion system has an

- exotoxin S/T/Y independent pathogenic role during acute lung infection. PLOS ONE 7: e41547. doi:10.1371/journal.pone.0041547. PubMed: 22844497.
37. Ware LB, Matthay MA (2000) The acute respiratory distress syndrome. N Engl J Med 342: 1334-1349. doi:10.1056/NEJM200005043421806. PubMed: 10793167.
  38. Ware LB, Matthay MA (2005) Clinical practice. Acute pulmonary edema. N Engl J Med 353: 2788-2796. doi:10.1056/NEJMcp052699. PubMed: 16382065.
  39. El-Solh AA, Hattemer A, Hauser AR, Alhajhusain A, Vora H (2012) Clinical outcomes of type III *Pseudomonas aeruginosa* bacteremia. Crit Care Med 40: 1157-1163. doi:10.1097/CCM.0b013e3182377906. PubMed: 22080633.
  40. Le Berre R, Nguyen S, Nowak E, Kipnis E, Pierre M et al. (2011) Relative contribution of three main virulence factors in *Pseudomonas aeruginosa* pneumonia. Crit Care Med 39: 2113-2120. doi:10.1097/CCM.0b013e31821e899f. PubMed: 21572326.
  41. Sayner SL, Frank DW, King J, Chen H, VandeWaa J et al. (2004) Paradoxical cAMP-induced lung endothelial hyperpermeability revealed by *Pseudomonas aeruginosa* ExoY. Circ Res 95: 196-203. doi:10.1161/01.RES.0000134922.25721.d9. PubMed: 15192021.
  42. Suttrop N, Hessz T, Seeger W, Wilke A, Koob R et al. (1988) Bacterial exotoxins and endothelial permeability for water and albumin *in vitro*. Am J Physiol 255: C368-C376. PubMed: 3138913.
  43. Engel J, Balachandran P (2009) Role of *Pseudomonas aeruginosa* type III effectors in disease. Curr Opin Microbiol 12: 61-66. doi:10.1016/j.mib.2008.12.007. PubMed: 19168385.
  44. Sato H, Frank DW, Hillard CJ, Feix JB, Pankhaniya RR et al. (2003) The mechanism of action of the *Pseudomonas aeruginosa*-encoded type III cytotoxin, ExoU. EMBO J 22: 2959-2969. doi:10.1093/emboj/cdg290. PubMed: 12805211.
  45. Sato H, Frank DW (2004) ExoU is a potent intracellular phospholipase. Mol Microbiol 53: 1279-1290. doi:10.1111/j.1365-2958.2004.04194.x. PubMed: 15387809.
  46. Anderson DM, Schmalzer KM, Sato H, Casey M, Terhune SS et al. (2011) Ubiquitin and ubiquitin-modified proteins activate the *Pseudomonas aeruginosa* T3SS cytotoxin, ExoU. Mol Microbiol 82: 1454-1467. doi:10.1111/j.1365-2958.2011.07904.x. PubMed: 22040088.
  47. Anderson DM, Frank DW (2012) Five mechanisms of manipulation by bacterial effectors: a ubiquitous theme. PLoS Pathog 8: e1002823. PubMed: 22927812.
  48. Housley NA, Winkler HH, Audia JP (2011) The *Rickettsia prowazekii* ExoU homologue possesses phospholipase A<sub>1</sub> (PLA<sub>1</sub>), PLA<sub>2</sub>, and lyso-PLA<sub>2</sub> activities and can function in the absence of any eukaryotic cofactors *in vitro*. J Bacteriol 193: 4634-4642. doi:10.1128/JB.00141-11. PubMed: 21764940.
  49. Sato H, Feix JB, Frank DW (2006) Identification of superoxide dismutase as a cofactor for the *Pseudomonas* type III toxin, ExoU. Biochemistry 45: 10368-10375. doi:10.1021/bi060788j. PubMed: 16922513.
  50. Barbieri JT, Sun J (2004) *Pseudomonas aeruginosa* ExoS and ExoT. Rev Physiol Biochem Pharmacol 152: 79-92. PubMed: 15375697.
  51. Frank DW (1997) The exoenzyme S regulon of *Pseudomonas aeruginosa*. Mol Microbiol 26: 621-629. doi:10.1046/j.1365-2958.1997.6251991.x. PubMed: 9427393.
  52. Shaver CM, Hauser AR (2004) Relative contributions of *Pseudomonas aeruginosa* ExoU, ExoS, and ExoT to virulence in the lung. Infect Immun 72: 6969-6977.
  53. Diaz MH, Shaver CM, King JD, Musunuri S, Kazzaz JA et al. (2008) *Pseudomonas aeruginosa* induces localized immunosuppression during pneumonia. Infect Immun 76: 4414-4421. doi:10.1128/IAI.00012-08. PubMed: 18663007.
  54. Galán JE, Wolf-Watz H (2006) Protein delivery into eukaryotic cells by type III secretion machines. Nature 444: 567-573. doi:10.1038/nature05272. PubMed: 17136086.
  55. Sato H, Frank DW (2011) Multi-Functional Characteristics of the *Pseudomonas aeruginosa* Type III Needle-Tip Protein, PcrV; Comparison to Orthologs in other Gram-negative Bacteria. Front Microbiol 2: 142. PubMed: 21772833.
  56. Sato H, Hunt ML, Weiner JJ, Hansen AT, Frank DW (2011) Modified needle-tip PcrV proteins reveal distinct phenotypes relevant to the control of type III secretion and intoxication by *Pseudomonas aeruginosa*. PLOS ONE 6: e18356. doi:10.1371/journal.pone.0018356. PubMed: 21479247.
  57. Allmond LR, Karaca TJ, Nguyen VN, Nguyen T, Wiener-Kronish JP et al. (2003) Protein binding between PcrG-PcrV and PcrH-PopB/PopD encoded by the pcrGVH-popBD operon of the *Pseudomonas aeruginosa* type III secretion system. Infect Immun 71: 2230-2233. doi:10.1128/IAI.71.4.2230-2233.2003. PubMed: 12654846.
  58. Goure J, Pastor A, Faudry E, Chabert J, Dessen A et al. (2004) The V antigen of *Pseudomonas aeruginosa* is required for assembly of the functional PopB/PopD translocation pore in host cell membranes. Infect Immun 72: 4741-4750. doi:10.1128/IAI.72.8.4741-4750.2004. PubMed: 15271936.
  59. Blocker A, Gounon P, Larquet E, Niebuhr K, Cabiaux V et al. (1999) The tripartite type III secretion of *Shigella flexneri* inserts IpaB and IpaC into host membranes. J Cell Biol 147: 683-693. doi:10.1083/jcb.147.3.683. PubMed: 10545510.
  60. Goure J, Broz P, Attree O, Cornelis GR, Attree I (2005) Protective anti-V antibodies inhibit *Pseudomonas* and *Yersinia* translocon assembly within host membranes. J Infect Dis 192: 218-225. doi:10.1086/430932. PubMed: 15962216.
  61. Neyt C, Cornelis GR (1999) Insertion of a Yop translocation pore into the macrophage plasma membrane by *Yersinia enterocolitica*: requirement for translocators YopB and YopD, but not LcrG. Mol Microbiol 33: 971-981. doi:10.1046/j.1365-2958.1999.01537.x. PubMed: 10476031.
  62. Neely AN, Holder IA, Wiener-Kronish JP, Sawa T (2005) Passive anti-PcrV treatment protects burned mice against *Pseudomonas aeruginosa* challenge. Burns 31: 153-158. doi:10.1016/j.burns.2004.09.002. PubMed: 15683685.
  63. Sawa T, Yahr TL, Ohara M, Kurahashi K, Gropper MA et al. (1999) Active and passive immunization with the *Pseudomonas* V antigen protects against type III intoxication and lung injury. Nat Med 5: 392-398. doi:10.1038/7391. PubMed: 10202927.
  64. Alvarez DF, King JA, Weber D, Addison E, Liedtke W et al. (2006) Transient receptor potential vanilloid 4-mediated disruption of the alveolar septal barrier: a novel mechanism of acute lung injury. Circ Res 99: 988-995. doi:10.1161/01.RES.0000247065.11756.19. PubMed: 17008604.
  65. King J, Hamil T, Creighton J, Wu S, Bhat P et al. (2004) Structural and functional characteristics of lung macro- and microvascular endothelial cell phenotypes. Microvasc Res 67: 139-151. doi:10.1016/j.mvr.2003.11.006. PubMed: 15020205.
  66. Parker JC, Stevens T, Randall J, Weber DS, King JA (2006) Hydraulic conductance of pulmonary microvascular and macrovascular endothelial cell monolayers. Am J Physiol Lung Cell Mol Physiol 291: L30-L37. doi:10.1152/ajplung.00317.2005. PubMed: 16760315.
  67. Birukov KG, Birukova AA, Dudek SM, Verin AD, Crow MT et al. (2002) Shear stress-mediated cytoskeletal remodeling and cortactin translocation in pulmonary endothelial cells. Am J Respir Cell Mol Biol 26: 453-464. doi:10.1165/ajrcmb.26.4.4725. PubMed: 11919082.
  68. Birukova AA, Tian Y, Meliton A, Leff A, Wu T et al. (2012) Stimulation of Rho signaling by pathologic mechanical stretch is a "second hit" to Rho-independent lung injury induced by IL-6. Am J Physiol Lung Cell Mol Physiol 302: L965-L975. doi:10.1152/ajplung.00292.2011. PubMed: 22345573.
  69. Dacheux D, Goure J, Chabert J, Usson Y, Attree I (2001) Pore-forming activity of type III system-secreted proteins leads to oncosis of *Pseudomonas aeruginosa*-infected macrophages. Mol Microbiol 40: 76-85. doi:10.1046/j.1365-2958.2001.02368.x. PubMed: 11298277.
  70. Broz P, Monack DM (2011) Molecular mechanisms of inflammasome activation during microbial infections. Immunol Rev 243: 174-190. doi:10.1111/j.1600-065X.2011.01041.x. PubMed: 21884176.
  71. Ogura Y, Sutterwala FS, Flavell RA (2006) The inflammasome: first line of the immune response to cell stress. Cell 126: 659-662. doi:10.1016/j.cell.2006.08.002. PubMed: 16923387.
  72. Saleh M, Green DR (2007) Caspase-1 inflammasomes: choosing between death and taxis. Cell Death Differ 14: 1559-1560. doi:10.1038/sj.cdd.4402203. PubMed: 17703235.
  73. Zhao Y, Yang J, Shi J, Gong YN, Lu Q et al. (2011) The NLRC4 inflammasome receptors for bacterial flagellin and type III secretion apparatus. Nature 477: 596-600. doi:10.1038/nature10510. PubMed: 21918512.
  74. Miao EA, Ernst RK, Dors M, Mao DP, Aderem A (2008) *Pseudomonas aeruginosa* activates caspase 1 through IpaF. Proc Natl Acad Sci U S A 105: 2562-2567. doi:10.1073/pnas.0712183105. PubMed: 18256184.
  75. Vallis AJ, Finck-Barbançon V, Yahr TL, Frank DW (1999) Biological effects of *Pseudomonas aeruginosa* type III-secreted proteins on CHO cells. Infect Immun 67: 2040-2044. PubMed: 10085057.
  76. Chatterjee A, Dimitropoulou C, Drakopanayiotakis F, Antonova G, Snead C et al. (2007) Heat shock protein 90 inhibitors prolong survival, attenuate inflammation, and reduce lung injury in murine sepsis. Am J Respir Crit Care Med 176: 667-675. doi:10.1164/rccm.200702-291OC. PubMed: 17615388.

77. Troyanovsky B, Alvarez DF, King JA, Schaphorst KL (2008) Thrombin enhances the barrier function of rat microvascular endothelium in a PAR-1-dependent manner. *Am J Physiol Lung Cell Mol Physiol* 294: L266-L275. PubMed: 18083763.
78. Leavesley SJ, Annamdevula N, Boni J, Stocker S, Grant K et al. (2012) Hyperspectral imaging microscopy for identification and quantitative analysis of fluorescently-labeled cells in highly autofluorescent tissue. *J Biophotonics* 5: 67-84. doi:10.1002/jbio.201100066. PubMed: 21987373.
